# Supplementary material for: WGCNA: an R package for weighted correlation network analysis
Source: Springer Nature journal article supplement (doi:10.1186/1471-2105-9-559), 2008-12-01

## Construct a gene co-expression network

**Rationale:** make use of interaction patterns among genes

**Tools:** correlation as a measure of co-expression

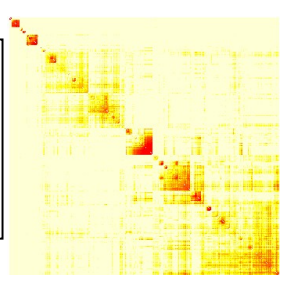

## Identify modules

**Rationale:** module (pathway) based analysis

**Tools:** hierarchical clustering, Dynamic Tree Cut

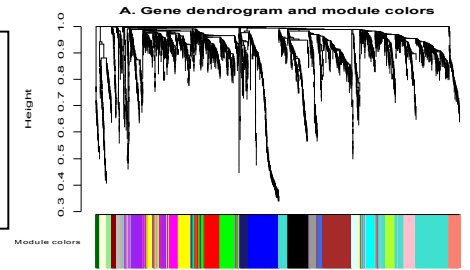

## Relate modules to external information

Array Information: clinical data, SNPs, proteomics

Gene Information: ontology, functional enrichment

**Rationale:** find biologically interesting modules

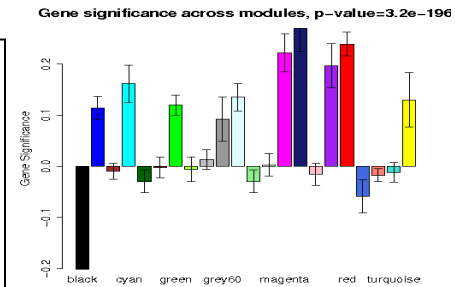

## Study module relationships

**Rationale:** biological data reduction, systems-level view

**Tools:** Eigengene Networks

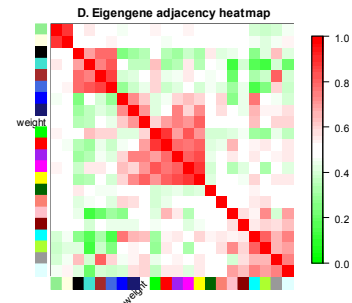

## Find the key drivers in *interesting* modules

**Rationale:** experimental validation, biomarkers

**Tools:** intramodular connectivity, causality testing

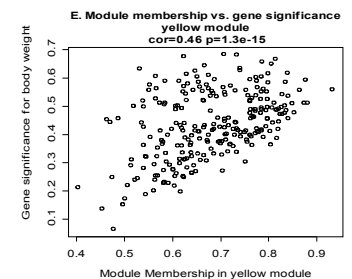

Supplement: 12859_2008_2544_MOESM1_ESM.pdf [file 12859_2008_2544_MOESM1_ESM.pdf]
