# Supplementary material for: WGCNA: an R package for weighted correlation network analysis
Source: Springer Nature journal article supplement (doi:10.1186/1471-2105-9-559), 2008-12-01

**A. Check of scale free topology**  
scale  $R^2= 0.97$  , slope=  $-2.76$

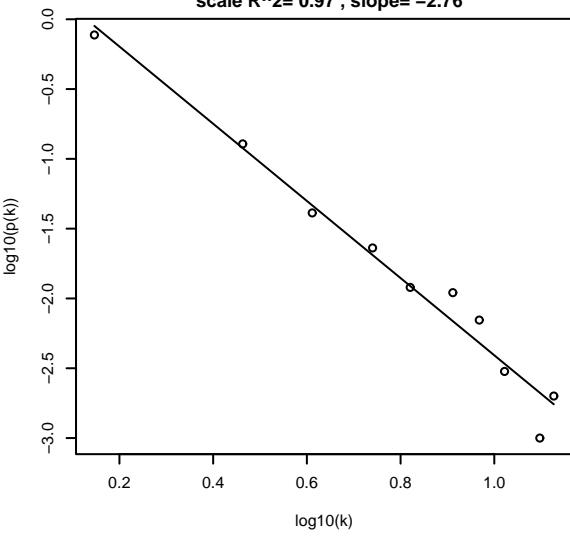

**B. Classical MDS**

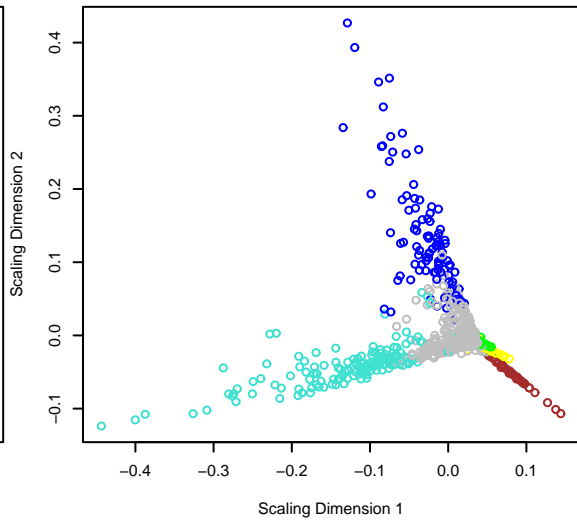

**C. Network heatmap plot**

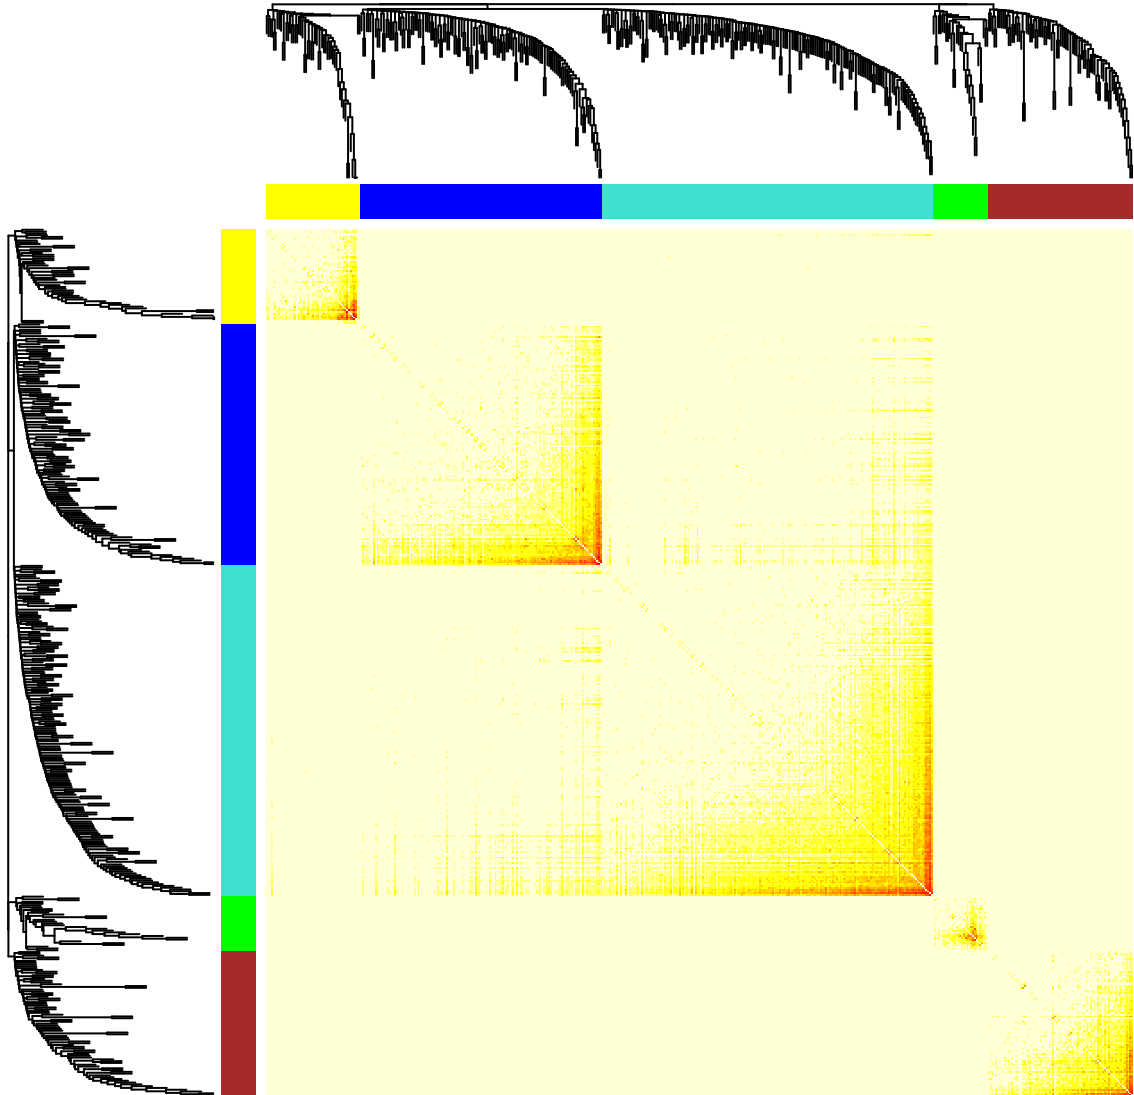

Supplement: 12859_2008_2544_MOESM2_ESM.pdf [file 12859_2008_2544_MOESM2_ESM.pdf]
