# Supplementary material for: WGCNA: an R package for weighted correlation network analysis
Source: Springer Nature journal article supplement (doi:10.1186/1471-2105-9-559), 2008-12-01

**A. Gene significance across modules**  
p-value=5.6e-13

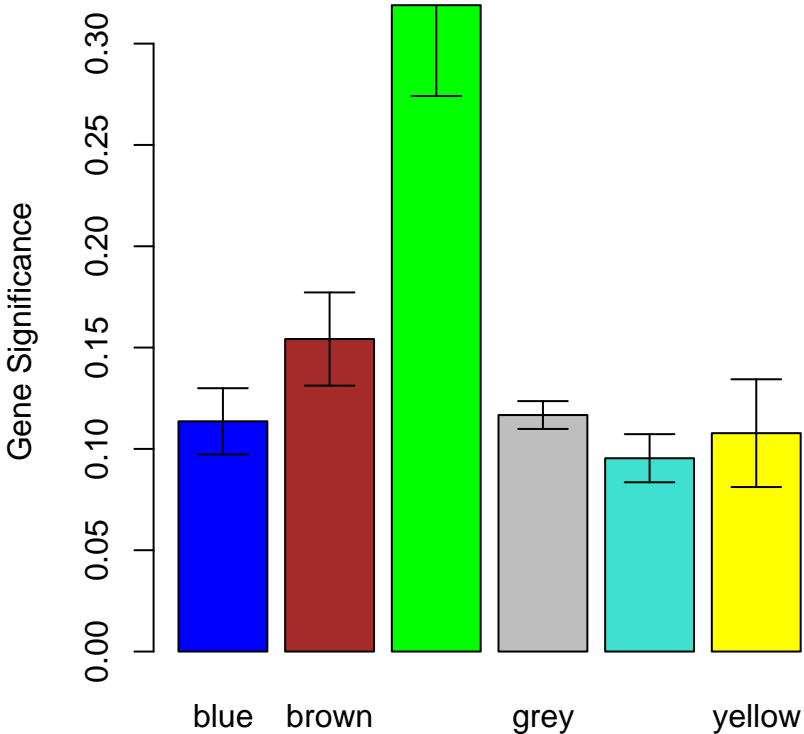

**B. GS vs. MM, green module**  
cor=0.87 p=<10<sup>-20</sup>

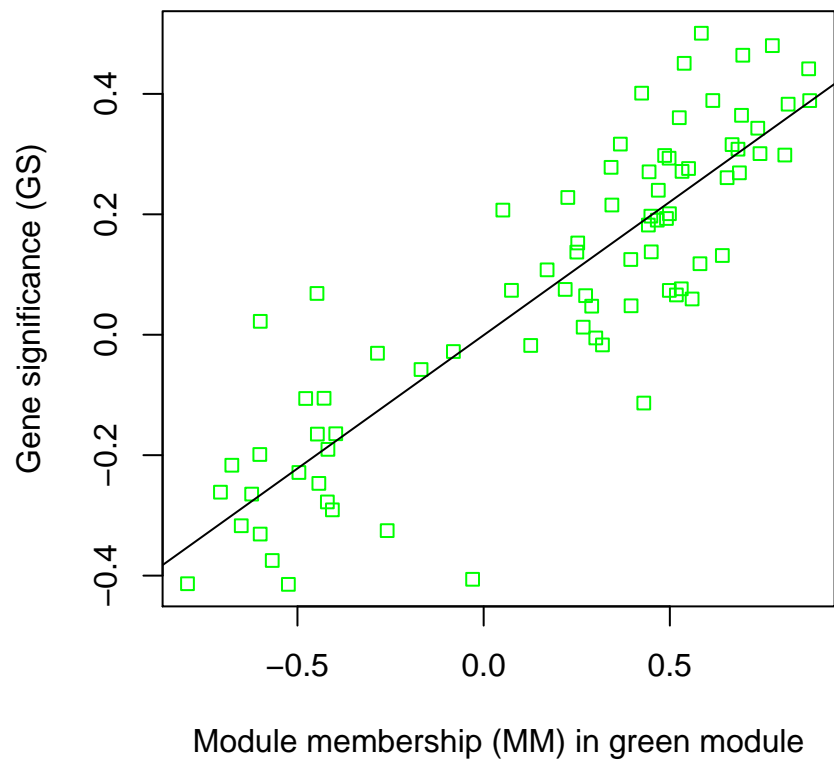

**C. Module eigengene dendrogram**

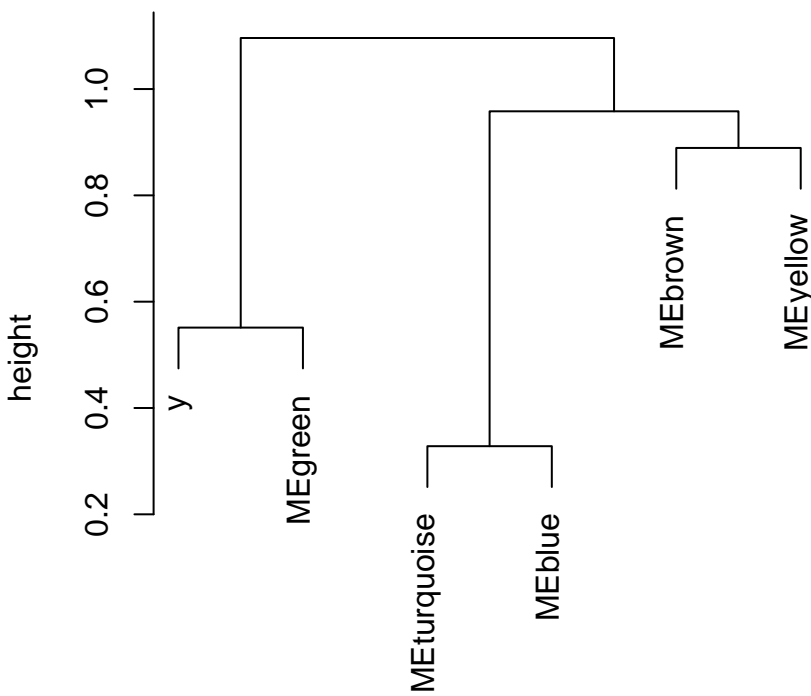

**D. Eigengene network heatmap**

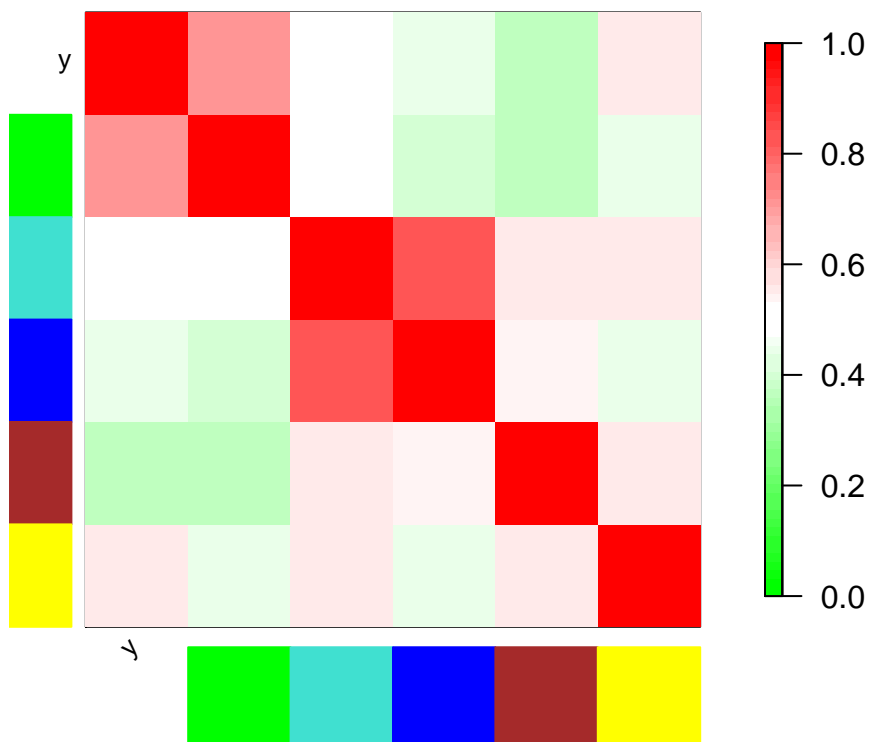

Supplement: 12859_2008_2544_MOESM3_ESM.pdf [file 12859_2008_2544_MOESM3_ESM.pdf]
