# Supplementary material for: WGCNA: an R package for weighted correlation network analysis
Source: Springer Nature journal article supplement (doi:10.1186/1471-2105-9-559), 2008-12-01

**A. Gene dendrogram and module colors**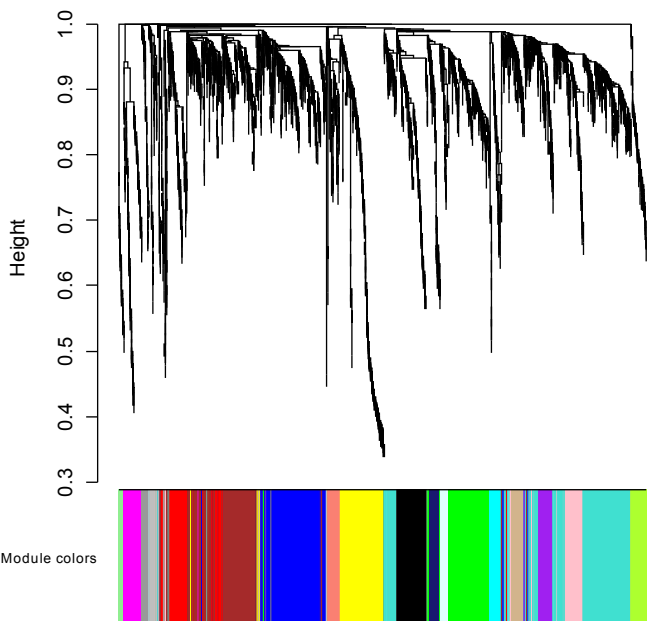**B. Network heatmap plot**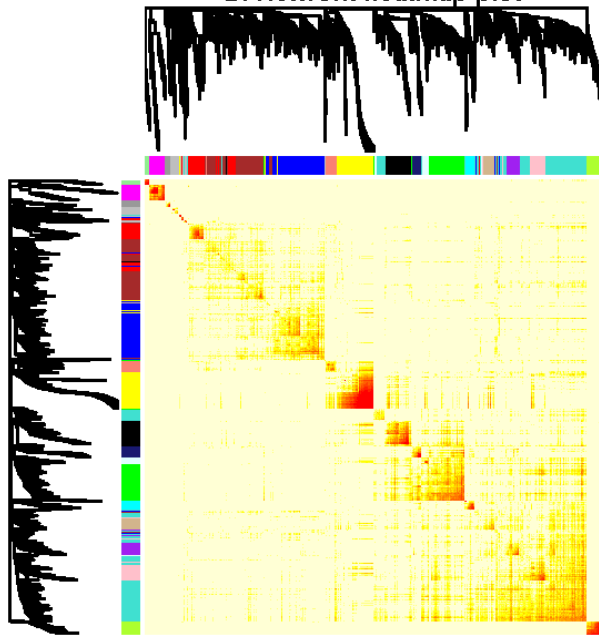**C. Eigengene dendrogram**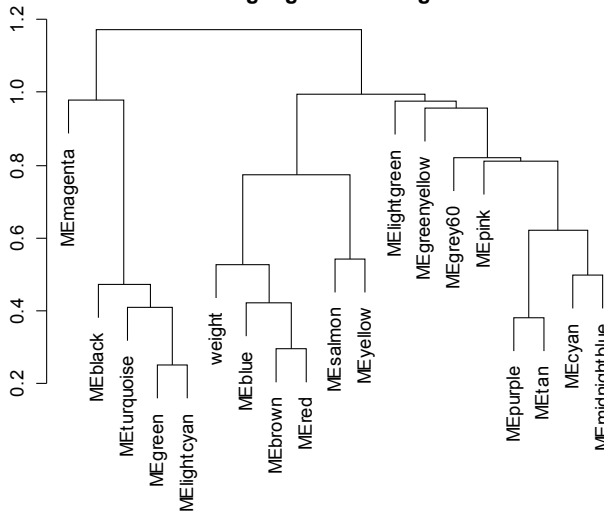**D. Eigengene adjacency heatmap**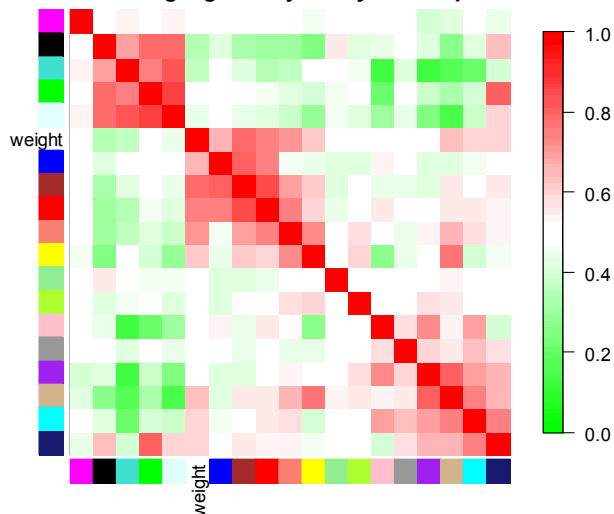**E. Module membership vs. gene significance**  
brown module  
 $cor=0.48$   $p<10^{-20}$ 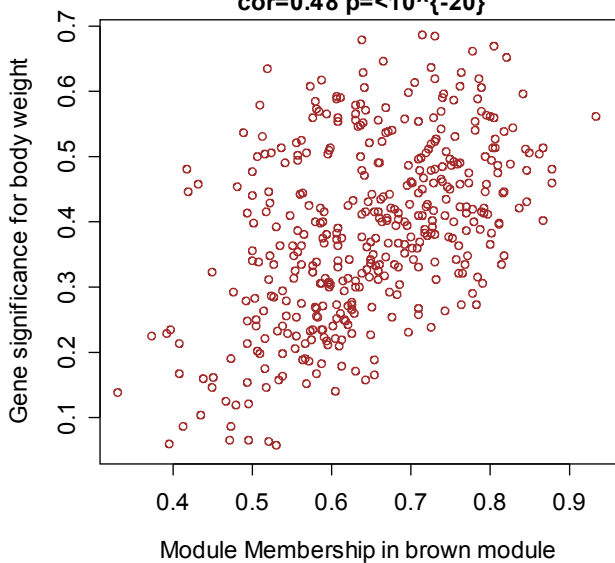**F. Network connections in brown module**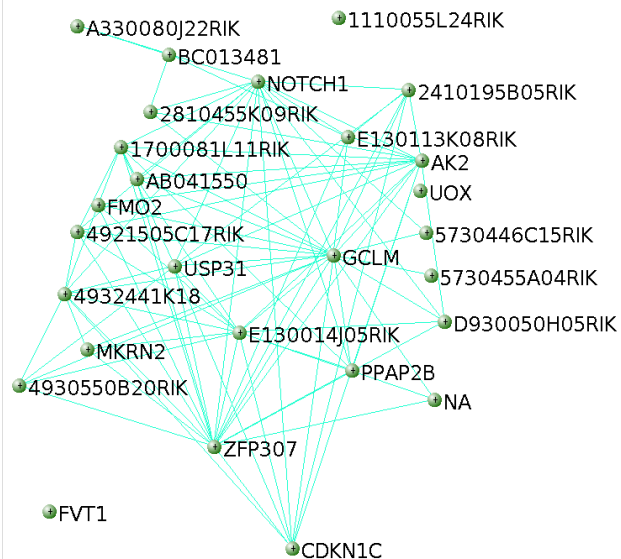

Supplement: 12859_2008_2544_MOESM4_ESM.pdf [file 12859_2008_2544_MOESM4_ESM.pdf]
